# Supplementary material for: Characterizing gene-gene interactions in a statistical epistasis network of twelve candidate genes for obesity
Source: PubMed Central journal article supplement (PMC4693412; doi:10.1186/s13040-015-0077-x), 2015-12-29

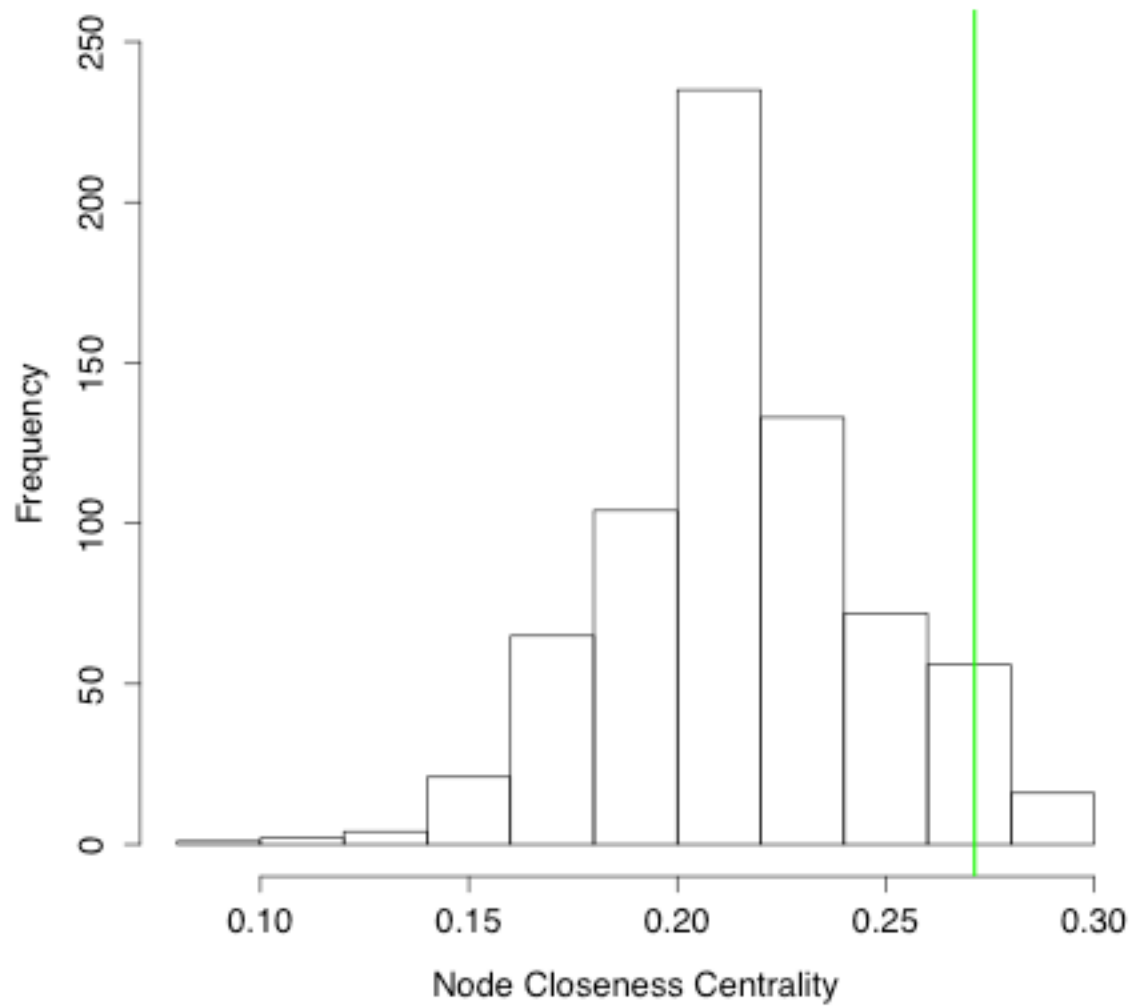

Supplement: 13040_2015_77_MOESM11_ESM.pdf [file 13040_2015_77_MOESM11_ESM.pdf]
